# Supplementary material for: Differences in Free-Living Patterns of Sedentary Behaviour between Office Employees with Diabetes and Office Employees without Diabetes: A Principal Component Analysis for Clinical Practice
Source: MDPI journal article supplement (doi:10.3390/ijerph191912245), 2022-09-27
Supplement: s1 [file s1]

**Table S1.** Abbreviations of the variables measured in the study.

| <b>Abbreviation</b> | <b>Variable</b>                                                                                                                                                                             |
|---------------------|---------------------------------------------------------------------------------------------------------------------------------------------------------------------------------------------|
| Diabetic            | Adults diagnosed with T2D according to International Criteria                                                                                                                               |
| Age                 | Patient's age (numeric)                                                                                                                                                                     |
| Sex                 | Patient's sex (categorical: M—male and F—female).                                                                                                                                           |
| BMI                 | Patient's body mass index (numeric: <18.5 kg/m <sup>2</sup> underweight, from 18.5 to 25 kg/m <sup>2</sup> normal, 25 to 30 kg/m <sup>2</sup> overweight, and >30 kg/m <sup>2</sup> obese). |
| <b>W</b>            | <b>Weekday – Total time</b>                                                                                                                                                                 |
| W-LIPA              | Weekday light-intensity physical activity (minutes/day)                                                                                                                                     |
| W-MVPA              | Weekday moderate to vigorous physical activity (minutes/day)                                                                                                                                |
| W-Seden             | Weekday sedentary time (minutes/day)                                                                                                                                                        |
| W-Stand             | Weekday standing time (minutes/day)                                                                                                                                                         |
| W-B20               | Weekday sedentary breaks <20 min (number/day)                                                                                                                                               |
| W-B2040             | Weekday sedentary breaks of 20-40 min (number/day)                                                                                                                                          |
| W-B4060             | Weekday sedentary breaks of 40-60 min (number/day)                                                                                                                                          |
| W-B60               | Weekday sedentary breaks >60 min (number/day)                                                                                                                                               |
| W-T20               | Weekday time spent in sedentary bouts <20 min (minutes/day)                                                                                                                                 |
| W-T2040             | Weekday time spent in sedentary bouts 20-40 min (minutes/day)                                                                                                                               |
| W-T4060             | Weekday time spent in sedentary bouts 40-60 min (minutes/day)                                                                                                                               |
| W-T60               | Weekday time spent in sedentary bouts >60 min (minutes/day)                                                                                                                                 |
| W-TB                | Weekday total sedentary breaks (number/day)                                                                                                                                                 |
| W-TT                | Weekday total sedentary time (minutes/day) weekday                                                                                                                                          |
| <b>WW</b>           | <b>Weekday - Working time</b>                                                                                                                                                               |
| WW-LIPA             | Light-intensity physical activity during working hours (minutes/day)                                                                                                                        |
| WW-MVPA             | Moderate to vigorous physical activity during working hours (minutes/day)                                                                                                                   |
| WW-Seden            | Sedentary time during working hours (minutes/day)                                                                                                                                           |
| WW-Stand            | Standing time during working hours (minutes/day)                                                                                                                                            |
| WW-B20              | Sedentary breaks <20 min during working hours (number/day)                                                                                                                                  |
| WW-B2040            | Sedentary breaks of 20-40 min during working hours (number/day)                                                                                                                             |
| WW-B4060            | Sedentary breaks of 40-60 min during working hours (number/day)                                                                                                                             |

|            |                                                                                   |
|------------|-----------------------------------------------------------------------------------|
| WW-B60     | Sedentary breaks >60 min during working hours (number/day)                        |
| WW-T20     | Time spent in sedentary bouts <20 min during working hours (minutes/day)          |
| WW-T2040   | Time spent in sedentary bouts of 20-40 min during working hours (minutes/day)     |
| WW-T4060   | Time spent in sedentary bouts of 40-60 min during working hours (minutes/day)     |
| WW-T60     | Time spent in sedentary bouts >60 min during working hours (minutes/day)          |
| WW-TB      | Total sedentary breaks (number/day)                                               |
| <b>WNW</b> | <b>Weekday – Non-Working time</b>                                                 |
| WNW-LIPA   | Light-intensity physical activity during non-working hours (minutes/day)          |
| WNW-MVPA   | Moderate to vigorous physical activity during non-working hours (minutes/day)     |
| WNW-Seden  | Sedentary time during non-working hours (minutes/day)                             |
| WNW-Stand  | Standing time during non-working hours (minutes/day)                              |
| WNW-B20    | Sedentary breaks <20 min during non-working hours (number/day)                    |
| WNW-B2040  | Sedentary breaks of 20-40 min during non-working hours (number/day)               |
| WNW-B4060  | Sedentary breaks of 40-60 min during non-working hours (number/day)               |
| WNW-B60    | Sedentary breaks >60 min during non-working hours (number/day)                    |
| WNW-T20    | Time spent in sedentary bouts <20 min during non-working hours (minutes/day)      |
| WNW-T2040  | Time spent in sedentary bouts of 20-40 min during non-working hours (minutes/day) |
| WNW-T4060  | Time spent in sedentary bouts of 40-60 min during non-working hours (minutes/day) |
| WNW-T60    | Time spent in sedentary bouts >60 min during non-working hours (minutes/day)      |
| WNW-TB     | Total sedentary breaks during non-working hours (minutes/day)                     |
| <b>WD</b>  | <b>Weekend</b>                                                                    |
| WD-LIPA    | Weekend light-intensity physical activity (minutes/day)                           |
| WD-MVPA    | Weekend moderate to vigorous physical activity (minutes/day)                      |
| WD-Seden   | Weekend sedentary time (minutes/day)                                              |
| WD-Stand   | Weekend standing time (minutes/day)                                               |
| WD-B20     | Weekend sedentary breaks <20 min (number/day)                                     |
| WD-B2040   | Weekend sedentary breaks of 20-40 min (number/day)                                |
| WD-B4060   | Weekend sedentary breaks of 40-60 min (number/day)                                |

|          |                                                                  |
|----------|------------------------------------------------------------------|
| WD-B60   | Weekend sedentary breaks >60 min (number/day)                    |
| WD-T20   | Weekend time spent in sedentary bouts <20 min (minutes/day)      |
| WD-T2040 | Weekend time spent in sedentary bouts of 20-40 min (minutes/day) |
| WD-T4060 | Weekend time spent in sedentary bouts of 40-60 min (minutes/day) |
| WD-T60   | Weekend time spent in sedentary bouts >60 min (minutes/day)      |
| WD-TB    | Weekend total sedentary breaks (number/day)                      |

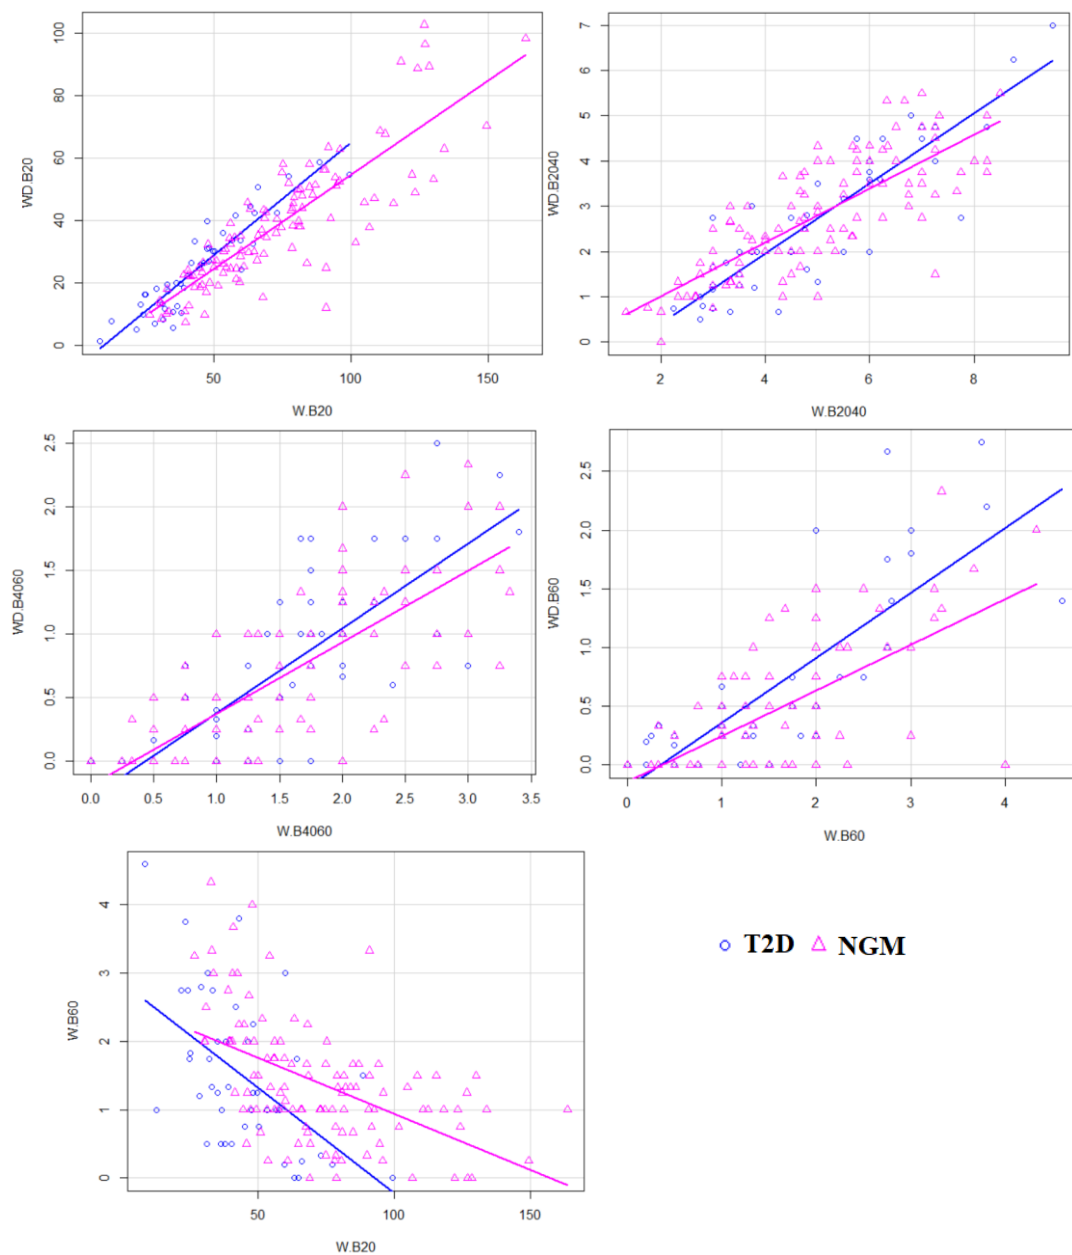

Figure S1. Scatter plots between the variables of the SB pattern on weekdays and at weekends.
